# Supplementary material for: A de novo IKZF4 variant impairs marginal zone B cells and regulatory T cells by downregulating the NF-κB pathway
Source: Research Square preprint supplement (doi:10.21203/rs.3.rs-6647352/v1), 2025-06-18
Supplement: Supplementary file 1 [file 527e1271e9ec69848b72ec6b.docx]

**Supplementary Table 3** Markers for cell identification and classification.

| **Cell subsets** | **Cell type markers** |
| --- | --- |
| **Cell type markers for flow cytometry** | |
| T cells | CD3+ |
| T helper cells | CD3+CD4+CD8- |
| Cytotoxic T cells | CD3+CD8+CD4- |
| B cells | CD19+ |
| Marginal zone B cells | CD19+CD21highCD23low |
| Follicular B cells | CD19+CD21lowCD23high |
| Natural killer cells | CD161+ |
| Double positive T cells | CD3+CD8+CD4+ |
| Double negative T cells | CD3+CD8-CD4- |
| CD4 Single positive T cells | CD3+CD4+CD8- |
| CD8 Single positive T cells | CD3+CD8+CD4- |
|  |  |
| **Marker genes for scRNA-Seq** | |
| T cells | *Cd3d, Cd3e, Cd3g* |
| B cells | *Cd19, Ptprc, Cd79a, Sdc1* |
| Natural killer cells | *Klrb1c, Ncr1* |
| Dendritic cells | *Itgax, Cd74, Cd83, Cd86* |
| Plasmacytoid dendritic cells | *Siglech, Bst2* |
| Granulocytes | *Itgam, Ccr3, Ly61* |
| Macrophages | *Adgre1, Cd68* |
| Monocytes | *Ccr2, Csf1r, Itgam* |
| Endothelial cells | *Pecam1, Cdh5, Icam2* |
| Erythroid progenitors | *Tfrc* |
| **B cells** |  |
| Follicular B cells | *Fcer2*, *Ighd* |
| Marginal Zone B cells | *Cr2*, *Ighm* |
| Germinal center B cells | *Cd38*, *Fas* |
| Regulatory B cells | *Cd274*, *Il10* |
| Memory B cells | *Cd27*, *Cd40*, *Cd80* |
| Plasma B cells | *Sdc1* |
| Transitional B cells | *Cd24*, *Cd38* |
| **T cells** |  |
| Activated T cells | *Cd69*, *Il2ra* |
| Naïve T cells | *Sell*, *IL7r* |
| Effector T cells | *Cd44* |
| Cytotoxic T cells | *Gzma*, *Prf1* |
| Effector memory T cells | *Cd44*, *IL7r* |
| Central memory T cells | *Sell*, *Cd44*, *IL7r* |
| Natural killer T cells | *Klrb1b*, *Klrb1c* |
| **CD4+ T cells** |  |
| Th 1 cells | *Cxcr3***,** *Tbet*, *Ifhg*, *Il2* |
| Th 2 cell | *Il1rl1*, *Gata3* |
| Th 17 cell | *Rorc*, *Il17a* |
| Tfh cell | *Cxcr5*, *Icos*, *Pdcd1* |
| Tfr cell | *Cxcr5*, *Pdcd1*, *Foxp3* |
| Th9 cell | *Il9*, *Il10* |
| Th22 cell | *Il22*, *Ccr6*, *Ccr4* |
| Treg cell | *Il2ra*, *Foxp3* |
| **Treg cells** |  |
| tTreg | *Ikzf2*, *Foxp3* |
| pTreg | *Foxp3* |
| iTreg | *Il2ra*, *Foxp3, Ctla4* |
