# Supplementary material for: A de novo IKZF4 variant impairs marginal zone B cells and regulatory T cells by downregulating the NF-κB pathway
Source: Research Square preprint supplement (doi:10.21203/rs.3.rs-6647352/v1), 2025-06-18
Supplement: Supplementary file 2 [file 969ee1e3a672406ec7898cae.docx]

**Supplementary Table 2** Primers used for qRT-PCR.

| **Primers** | **Sequences** |
| --- | --- |
| Human*-ACTB*-forward | 5’-GTTGCGTTACACCCTTTCTT-3’ |
| Human*-ACTB*-reverse | 5’-ACCTTCACCGTTCCAGTTT-3’ |
| Human*-IKZF4*-forward | 5’- GTACCCTGGAGGAGCACAAG-3’ |
| Human*-IKZF4*-reverse | 5’-GAGTCTGGCACCATCTCCAG-3’ |
| Mouse-*Actb*-forward | 5’-TTCTTTGCAGCTCCTTCGTT-3’ |
| Mouse-*Actb*-reverse | 5’-ATGGAGGGGAATACAGCCC-3’ |
| Mouse-*Ikzf4*-forward | 5’-CAACAGCCTCACCAAACGC-3’ |
| Mouse-*Ikzf4*-forward | 5’-TCCTTTTCATAGCCACCGCT-3’ |
| Mouse-*Il6*-forward | 5’-ACAGAGGATACCACTCCCAAC-3’ |
| Mouse-*Il6*-reverse | 5’-ATCCAGTTTGGTAGCATCCATC-3’ |
| Mouse-*Il10*-forward | 5’-ATCTCCTAGAGCTGCGGACT-3’ |
| Mouse-*Il10*-reverse | 5’-CCTTGATTTCTGGGCCATGC-3’ |
