# Supplementary material for: A de novo IKZF4 variant impairs marginal zone B cells and regulatory T cells by downregulating the NF-κB pathway
Source: Research Square preprint supplement (doi:10.21203/rs.3.rs-6647352/v1), 2025-06-18
Supplement: Supplementary file 3 [file ebcffff6705c8625bd29fe04.docx]

**Supplementary Table 1** Antibodies used in this research.

| **Antibodies** | **Suppliers** | **Cat. No.** |
| --- | --- | --- |
| **Antibodies used for WB and Co-IP** | | |
| Anti-GAPDH antibody | Cell Signaling Technology | CST2118 |
| Anti-ACTB antibody | Cell Signaling Technology | CST3700 |
| Anti-DYKDDDDK(Flag) Tag (9A3) antibody | Cell Signaling Technology | CST8146 |
| Anti-IKZF4(EOS) antibody | AbCam | ab220329 |
| Anti-IKZF1(IKAROS) antibody | Cell Signaling Technology | CST5443 |
| Anti-IKZF1(IKAROS) antibody | Santa Cruz | sc-398265 |
| Anti-IKZF3(AIOLOS) antibody | Cell Signaling Technology | CST15103 |
| Anti-IKZF3(AIOLOS) antibody | Santa Cruz | sc-293421 |
| Anti-P-P65 antibody | Cell Signaling Technology | CST3033 |
| Anti-P65 antibody | Cell Signaling Technology | CST3034 |
| Normal Mouse IgG | Santa Cruz | sc-2025 |
| Normal Rabbit IgG | Cell signaling technology | CST2729 |
|  |  |  |
| **Antibodies used for flow cytometry** | | |
| Anti-CD3-APC | BD | 553066 |
| Anti-CD4-FITC antibody | Invitrogen | 11-0042-82 |
| Anti-CD8-PerCP-Cy5.5 antibody | Invitrogen | 14-0081-82 |
| Anti-CD19-FITC antibody | Invitrogen | 11-0193-82 |
| Anti-CD23-PE antibody | Invitrogen | 12-0232-82 |
| Anti-CD21-APC antibody | BioLegend | 123411 |
| Anti-CD161-PE antibody | Invitrogen | 12-5941-82 |
|  |  |  |
| **Antibodies used for immunofluorescence** | | |
| Anti-IKZF4(EOS) antibody | AbCam | ab220329 |
| Anti-IKZF1(IKAROS) antibody | Santa Cruz | sc-398265 |
| Anti-IKZF3(AIOLOS) antibody | Santa Cruz | sc-293421 |
| Alexa Fluor™ 488 (Goat-anti-Rabbit) | Invitrogen | A-11008 |
| Alexa Fluor™ 594 (Goat-anti-Rabbit) | Invitrogen | A-11012 |
| Alexa Fluor™ 488 (Goat-anti-Mouse) | Invitrogen | A-11001 |
| Alexa Fluor™ 594 (Goat-anti-Mouse) | Invitrogen | A-11005 |
